# Supplementary material for: Trapping Pd(0) in nanoparticle-assembled microcapsules: an efficient and reusable catalyst
Source: Royal Society of Chemistry journal article supplement (doi:10.1039/b807736c), 2008-01-01
Supplement: b807736c.pdf [file b807736c.pdf]

## Supplementary Information

# Trapping Pd (0) in Nanoparticle-Assembled Microcapsules: An Efficient and Reusable Catalyst

Arlin Jose Amali, and Rohit Kumar Rana\*

Nanomaterials Laboratory, Inorganic & Physical Chemistry Division,  
Indian Institute of Chemical Technology, Hyderabad 500007, India.  
E.mail: rkrana@iict.res.in, Tel: +91-40-27160123 Ext.2387/2386  
Fax: +91-40-27160921

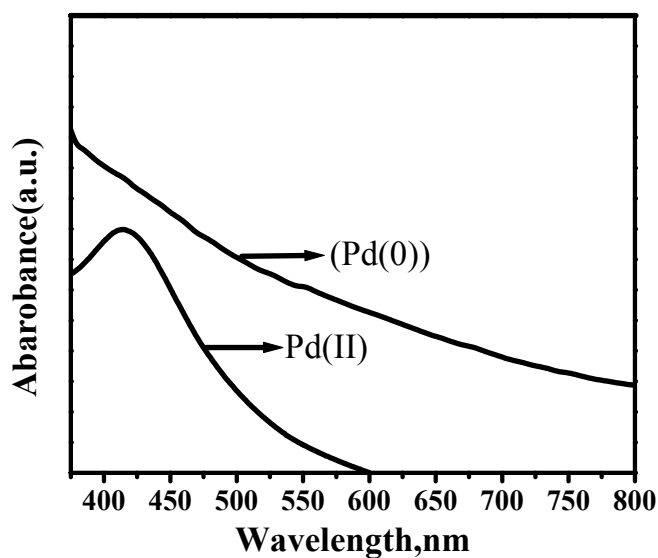

**Figure S1.** UV-Vis spectrum indicating Pd (II) in an aqueous solution of  $\text{Na}_2\text{PdCl}_4$  and UV-Vis-DRS indicating Pd(0) in Pd@MC .

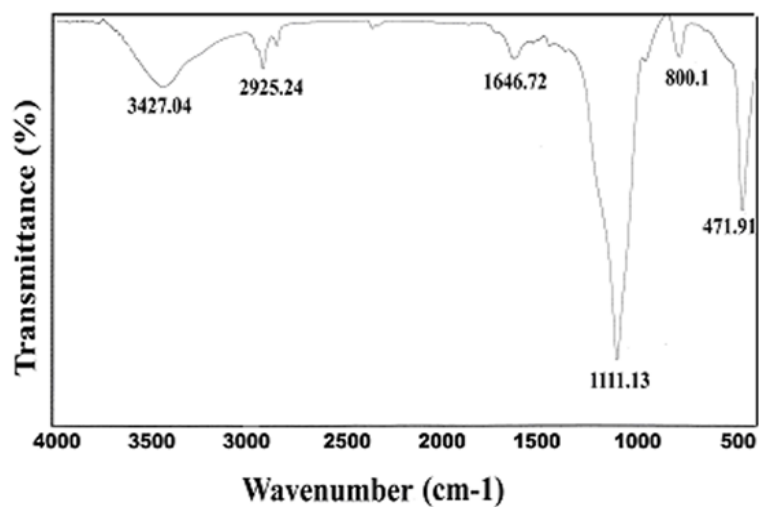

Figure S2. FT-IR spectrum of Pd@MC.

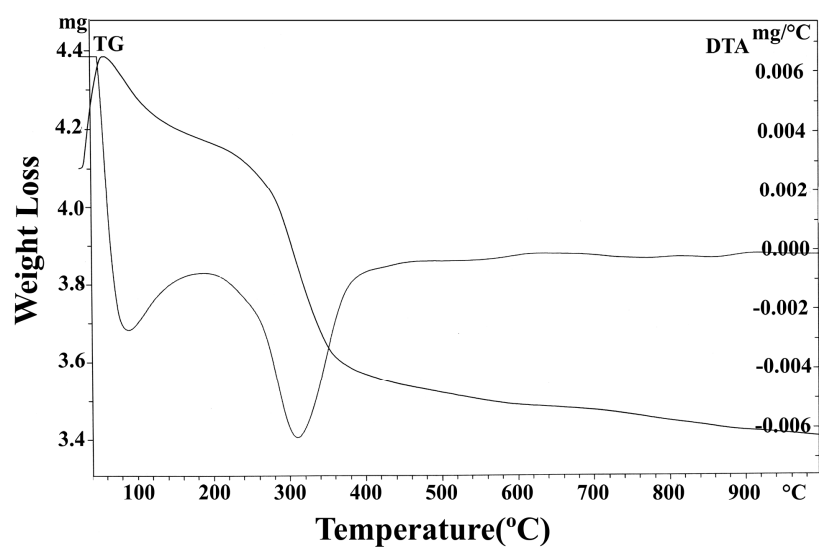

Figure S3. TG-DTA profile of Pd@MC.

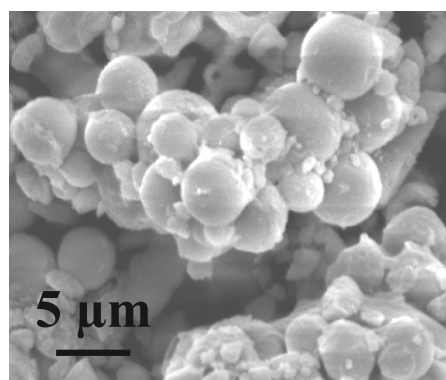

**Figure S4.** SEM image illustrating the micron-sized spherical morphology of the recovered Pd@MC catalyst after 3rd run.

**Synthesis of Pd-PLL and its catalytic activity for conversion of nitroarenes:**

For preparing Pd-PLL, 0.25 mL of sodium tetrachloro palladate (0.01M) and 1.0 mL of PLL (2mg mL<sup>-1</sup>, 150 kDa) mixed in 4 ml of water. To reduce the palladium ions 100μL of sodium borohydride (0.01M) was added and stirred for 30min during which the suspension colour turned coffee-brown. Thus synthesized Pd-PLL was further used as a catalyst in hydrogenation of nitroarenes. The reaction conditions were kept similar to that with Pd@MC except that 0.5 ml of Pd-PLL suspension was used as catalyst. The reaction progress was monitored by thin layer chromatography and the conversions obtained by GC analysis are given in Table S1.

**Table S1.** Conversion of various nitroarenes to corresponding amines using Pd-PLL as catalyst.

| Substrate             | Time (min) | Conversion (%) |
|-----------------------|------------|----------------|
| nitrobenzene          | 60         | >99            |
| p-chloro nitrobenzene | 60         | > 99           |
| p-nitro phenol        | 60         | > 99           |

### Recyclability of the Pd@MC catalyst:

For testing the reusability of the Pd@MC catalyst, it was separated from the reaction mixture by centrifugation and washed with ethyl acetate. The catalytic activity of the recovered catalyst was evaluated for the conversion of nitrobenzene to aniline. The reactions parameters were kept similar to that in the 1<sup>st</sup> reaction cycle. Conversion was measured by gas chromatography.

**Table S2.** Activity of the separated Pd@MC catalyst in hydrogenation of nitrobenzene to aniline after 90 min of reaction time.

| Run number | Conversion (%) |
|------------|----------------|
| 1          | > 99           |
| 2          | > 99           |
| 3          | > 99           |
| 4          | > 99           |
| 5          | > 99           |
